# Supplementary material for: Genetic predisposition and induced pro-inflammatory/pro-oxidative status may play a role in increased atherothrombotic events in nilotinib treated chronic myeloid leukemia patients
Source: PubMed Central journal article supplement (PMC5342164; doi:10.18632/oncotarget.11100), 2016-08-05
Supplement: oncotarget-07-72311-s001.pdf [file oncotarget-07-72311-s001.pdf]

## Genetic predisposition and induced pro-inflammatory/pro-oxidative status may play a role in increased atherothrombotic events in nilotinib treated chronic myeloid leukemia patients

### Supplementary Material

**Table S1: Clinical and biochemical parameters in the studied population according to TKI treatment and cardiovascular event**

|                        | imatinib               |                          |                              | nilotinib               |                           |                               | whole cohort<br>CV event free | whole cohort<br>CV event | matched controls |
|------------------------|------------------------|--------------------------|------------------------------|-------------------------|---------------------------|-------------------------------|-------------------------------|--------------------------|------------------|
|                        | all patients<br>(n=65) | without tcrf #<br>(n=29) | treated for tcrf #<br>(n=19) | all patients<br>(n= 45) | without tcrf #<br>(n= 19) | treated for tcrf #<br>(n= 24) | (n= 93)                       | (n= 17)                  | (n= 60)          |
| <b>SAP</b> (mmHg)      | 140<br>(135-145)       | 138<br>(135-141)         | 142<br>(139-145)             | 138<br>(130-145)        | 136<br>(130-142)          | 140<br>(135-145)              | 138<br>(130-145)              | 140<br>(135-145)         | 135<br>(130-140) |
| <b>DAP</b> (mmHg)      | 85<br>(80-90)          | 85<br>(80-90)            | 88<br>(85-91)                | 86<br>(80-92)           | 85<br>(80-90)             | 88<br>(85-92)                 | 86<br>(80-92)                 | 89<br>(85-92)            | 85<br>(80-90)    |
| <b>LDL</b> (mg/dl)     | 117<br>(109-125)       | 119<br>(111-127)         | 114<br>(105-123)             | 124<br>(118-130)        | 122<br>(118-126)          | 127<br>(121-133)              | 115<br>(109-130)              | 126<br>(121-133)         | 115<br>(100-130) |
| <b>HDL</b> (mg/dl)     | 50<br>(46-52)          | 48<br>(45-51)            | 48<br>(44-52)                | 49<br>(46-52)           | 50<br>(48-52)             | 48<br>(46-50)                 | 50<br>(46-42)                 | 48<br>(44-50)            | 50<br>(45-55)    |
| <b>TG</b> (mg/dl)      | 118<br>(110-126)       | 114<br>(107-121)         | 122<br>(118-126)             | 120<br>(108-132)        | 116<br>(108-124)          | 124<br>(117-132)              | 118<br>(107-126)              | 123<br>(110-132)         | 120<br>(110-130) |
| <b>Glucose</b> (mg/dl) | 94<br>(86-102)         | 96<br>(90-102)           | 92<br>(86-98)                | 97<br>(87-108)          | 94<br>(87-101)            | 100<br>(92-108)               | 94<br>(86-102)                | 98<br>(90-108)           | 95<br>(90-100)   |
| <b>Hs-CRP</b> (mg/dl)  | 1.1<br>(0.8-1.4)       | 1.0<br>(0.8-1.2)         | 1.2<br>(1.0-1.4)             | 1.4<br>(1.1-1.7)        | 1.3<br>(1.1-1.5)          | 1.5<br>(1.3-1.7)              | 1.1<br>(0.8-1.4)              | 1.4<br>(1.1-1.7)         | 1<br>(0.7-1.3)   |
| <b>Ox-LDL</b> (UI/L)   | 70<br>(62-78)          | 68<br>(62-74)            | 72<br>(66-78)                | 92<br>(82-103)*†        | 89<br>(82-96)*†           | 95<br>(87-103)*†              | 76<br>(62-84)                 | 93<br>(87-103)§          | 65<br>(60-70)    |
| <b>sCD40L</b> (pg/ml)  | 330<br>(271-388)       | 326<br>(271-380)         | 334<br>(280-388)             | 513<br>(434-601)*†      | 508<br>(434-582)*†        | 518<br>(435-601)*†            | 330<br>(271-390)              | 514<br>(388-601)§        | 350<br>(320-370) |
| <b>ETP</b> (%)         | 7<br>(6-8)             | 6.7<br>(6-7.4)           | 7.3<br>(6.6-8)               | 15<br>(11-19)*†         | 14<br>(11-17)*†           | 16<br>(13-19)*†               | 7<br>(6-7.4)                  | 14<br>(11-19)§           | 5<br>(2.5-7.5)   |
| <b>TNFα</b> (pg/ml)    | 10<br>(8-12)           | 9.3<br>(8-10.6)          | 10.7<br>(9.4-12)             | 11<br>(9-13)†           | 12<br>(11-13)             | 10<br>(9-11)                  | 10.1<br>(8-12.6)              | 11<br>(9.4-13)           | 9.5<br>(8-11)    |
| <b>IL6</b> (pg/ml)     | 9<br>(7.5-10.5)        | 9.4<br>(8.3-10.5)        | 8.6<br>(7.5-9.7)             | 10<br>(8-12)            | 9.5<br>(8-11)             | 10.5<br>(9-12)                | 9.1<br>(7.5-10.5)             | 10.4<br>(8-12)           | 9<br>(8-10)      |
| <b>IL10</b> (pg/ml)    | 4.9<br>(3.8-6)         | 5<br>(4-6)               | 4.8<br>(3.8-5.8)             | 1.1<br>(0.6-1.7)†       | 1<br>(0.6-1.4)*†          | 1.2<br>(0.7-1.7)*†            | 4.6<br>(1.6-6)                | 1.1<br>(0.6-1.7)§        | 5<br>(4-6)       |

Abbreviation: CV cardiovascular, TCRF traditional cardiovascular risk factors, SAP Systolic arterial pressure, DAP diastolic arterial pressure, LDL low-density lipoprotein cholesterol, HDL high-density lipoprotein cholesterol, TG triglycerides, hs-CRP high-sensitivity C-reactive protein, ox-LDL oxidized-LDL, sCD40L soluble CD40 ligand, ETP endogenous thrombin potential, TNF $\alpha$  Tumor necrosis factor alpha, IL6 Interleukin-6, IL10 Interleukin-10.

To convert in mmol/L ° x 0.02586, °° x 0.01143

Mann-Whitney U test; \* p< 0.05 between TKIs, † p<0.05 TKIs vs controls, § p< 0.05 patients affected by vascular events vs event free.

# statins, and/or ace-inhibitors/angiotensin receptor blockers and/or oral glucose lowering drugs and/or antiplatelet drugs.

**Table S2. Correlations between antropometric and biochemical variables in CML patients treated with imatinib (A) or nilotinib (B). In each cell, the first value represents the Kendall rank correlation Coefficient, the second value (in Italics) the P val**

**A:IMATINIB**

| Variable                       | TNF- $\alpha$          | IL-6                         | IL-10                  | Ox-LDL                       | sCD40L                        | ETP                    | Hs-CRP                        | LDL                   | HDL                    | TG                    | Glucose               | SAP                          | DAP      | BMI      |
|--------------------------------|------------------------|------------------------------|------------------------|------------------------------|-------------------------------|------------------------|-------------------------------|-----------------------|------------------------|-----------------------|-----------------------|------------------------------|----------|----------|
| <b>TNF-<math>\alpha</math></b> | <b>1</b>               |                              |                        |                              |                               |                        |                               |                       |                        |                       |                       |                              |          |          |
| <b>IL-6</b>                    | 0.195<br><i>0.058</i>  | <b>1</b>                     |                        |                              |                               |                        |                               |                       |                        |                       |                       |                              |          |          |
| <b>IL-10</b>                   | 0.195<br><i>-0.148</i> | 0.075<br><i>0.273</i>        | <b>1</b>               |                              |                               |                        |                               |                       |                        |                       |                       |                              |          |          |
| <b>Ox-LDL</b>                  | 0.172<br><i>0.070</i>  | 0.133<br><i>0.142</i>        | -0.204<br><i>0.058</i> | <b>1</b>                     |                               |                        |                               |                       |                        |                       |                       |                              |          |          |
| <b>sCD40L</b>                  | 0.186<br><i>0.061</i>  | <b>0.229</b><br><i>0.046</i> | -0.202<br><i>0.059</i> | <b>0.233</b><br><i>0.041</i> | <b>1</b>                      |                        |                               |                       |                        |                       |                       |                              |          |          |
| <b>ETP</b>                     | 0.147<br><i>0.090</i>  | 0.128<br><i>0.099</i>        | -0.189<br><i>0.085</i> | 0.180<br><i>0.074</i>        | <b>0.246</b><br><i>0.030</i>  | <b>1</b>               |                               |                       |                        |                       |                       |                              |          |          |
| <b>Hs-CRP</b>                  | 0.116<br><i>0.109</i>  | <b>0.239</b><br><i>0.045</i> | -0.185<br><i>0.077</i> | 0.189<br><i>0.080</i>        | 0.161<br><i>0.090</i>         | 0.172<br><i>0.088</i>  | <b>1</b>                      |                       |                        |                       |                       |                              |          |          |
| <b>LDL</b>                     | 0.188<br><i>0.065</i>  | 0.132<br><i>0.099</i>        | -0.189<br><i>0.079</i> | <b>0.241</b><br><i>0.041</i> | 0.159<br><i>0.101</i>         | 0.187<br><i>0.061</i>  | 0.181<br><i>0.072</i>         | <b>1</b>              |                        |                       |                       |                              |          |          |
| <b>HDL</b>                     | -0.119<br><i>0.370</i> | -0.051<br><i>0.341</i>       | 0.197<br><i>0.061</i>  | -0.188<br><i>0.085</i>       | <b>-0.220</b><br><i>0.040</i> | -0.177<br><i>0.070</i> | <b>-0.211</b><br><i>0.048</i> | 0.177<br><i>0.085</i> | <b>1</b>               |                       |                       |                              |          |          |
| <b>TG</b>                      | 0.194<br><i>0.061</i>  | 0.077<br><i>0.268</i>        | -0.113<br><i>0.181</i> | 0.172<br><i>0.104</i>        | 0.140<br><i>0.112</i>         | 0.098<br><i>0.308</i>  | 0.052<br><i>0.338</i>         | 0.135<br><i>0.119</i> | -0.199<br><i>0.052</i> | <b>1</b>              |                       |                              |          |          |
| <b>Glucose</b>                 | 0.199<br><i>0.059</i>  | 0.141<br><i>0.107</i>        | -0.169<br><i>0.097</i> | 0.161<br><i>0.099</i>        | 0.192<br><i>0.054</i>         | 0.116<br><i>0.247</i>  | 0.101<br><i>0.197</i>         | 0.118<br><i>0.171</i> | -0.175<br><i>0.072</i> | 0.182<br><i>0.064</i> | <b>1</b>              |                              |          |          |
| <b>SAP</b>                     | 0.092<br><i>0.229</i>  | <b>0.232</b><br><i>0.046</i> | -0.090<br><i>0.235</i> | 0.067<br><i>0.295</i>        | 0.104<br><i>0.163</i>         | 0.157<br><i>0.096</i>  | 0.144<br><i>0.094</i>         | 0.099<br><i>0.213</i> | -0.108<br><i>0.102</i> | 0.096<br><i>0.128</i> | 0.127<br><i>0.103</i> | <b>1</b>                     |          |          |
| <b>DAP</b>                     | -0.037<br><i>0.384</i> | 0.087<br><i>0.241</i>        | -0.144<br><i>0.123</i> | 0.183<br><i>0.071</i>        | 0.153<br><i>0.106</i>         | 0.128<br><i>0.152</i>  | 0.107<br><i>0.196</i>         | 0.118<br><i>0.171</i> | -0.045<br><i>0.359</i> | 0.109<br><i>0.102</i> | 0.139<br><i>0.108</i> | <b>0.254</b><br><i>0.038</i> | <b>1</b> |          |
| <b>BMI</b>                     | 0.029                  | 0.147                        | -0.186                 | 0.129                        | 0.124                         | 0.101                  | 0.175                         | 0.025                 | -0.183                 | <b>0.208</b>          | 0.194                 | 0.119                        | 0.158    | <b>1</b> |

|  |       |       |       |       |       |       |       |       |       |              |       |       |       |
|--|-------|-------|-------|-------|-------|-------|-------|-------|-------|--------------|-------|-------|-------|
|  | 0.408 | 0.094 | 0.080 | 0.118 | 0.127 | 0.208 | 0.076 | 0.420 | 0.069 | <b>0.046</b> | 0.058 | 0.090 | 0.077 |
|--|-------|-------|-------|-------|-------|-------|-------|-------|-------|--------------|-------|-------|-------|

## B:NILOTINIB

| Variable                       | TNF- $\alpha$   | IL-6            | IL-10                             | Ox-LDL                           | sCD40L                       | ETP             | Hs-CRP          | LDL            | HDL                           | TG             | Glucose        | SAP | DAP | BMI |
|--------------------------------|-----------------|-----------------|-----------------------------------|----------------------------------|------------------------------|-----------------|-----------------|----------------|-------------------------------|----------------|----------------|-----|-----|-----|
| <b>TNF-<math>\alpha</math></b> | 1               |                 |                                   |                                  |                              |                 |                 |                |                               |                |                |     |     |     |
| <b>IL-6</b>                    | 0.198<br>0.054  | 1               |                                   |                                  |                              |                 |                 |                |                               |                |                |     |     |     |
| <b>IL-10</b>                   | -0.178<br>0.063 | -0.139<br>0.099 | 1                                 |                                  |                              |                 |                 |                |                               |                |                |     |     |     |
| <b>Ox-LDL</b>                  | 0.118<br>0.117  | 0.153<br>0.092  | <b>-0.454</b><br><b>&lt;0.001</b> | 1                                |                              |                 |                 |                |                               |                |                |     |     |     |
| <b>sCD40L</b>                  | 0.136<br>0.094  | 0.189<br>0.069  | <b>-0.390</b><br><b>0.003</b>     | <b>0.453</b><br><b>&lt;0.001</b> | 1                            |                 |                 |                |                               |                |                |     |     |     |
| <b>ETP</b>                     | 0.107<br>0.114  | 0.128<br>0.110  | <b>-0.388</b><br><b>0.003</b>     | <b>0.445</b><br><b>0.001</b>     | <b>0.446</b><br><b>0.001</b> | 1               |                 |                |                               |                |                |     |     |     |
| <b>Hs-CRP</b>                  | 0.196<br>0.055  | 0.169<br>0.070  | -0.178<br>0.083                   | 0.181<br>0.081                   | 0.161<br>0.099               | 0.172<br>0.090  | 1               |                |                               |                |                |     |     |     |
| <b>LDL</b>                     | 0.189<br>0.063  | 0.122<br>0.108  | -0.182<br>0.081                   | 0.175<br>0.088                   | 0.189<br>0.079               | 0.187<br>0.066  | 0.161<br>0.084  | 1              |                               |                |                |     |     |     |
| <b>HDL</b>                     | -0.116<br>0.114 | -0.091<br>0.119 | 0.159<br>0.088                    | -0.190<br>0.079                  | -0.190<br>0.061              | -0.167<br>0.075 | -0.193<br>0.058 | 0.157<br>0.090 | 1                             |                |                |     |     |     |
| <b>TG</b>                      | 0.154<br>0.081  | 0.097<br>0.112  | -0.119<br>0.177                   | 0.162<br>0.091                   | 0.140<br>0.112               | 0.148<br>0.096  | 0.102<br>0.208  | 0.130<br>0.099 | <b>-0.206</b><br><b>0.049</b> | 1              |                |     |     |     |
| <b>Glucose</b>                 | 0.180<br>0.072  | 0.122<br>0.116  | -0.178<br>0.083                   | 0.181<br>0.081                   | 0.162<br>0.081               | 0.176<br>0.087  | 0.130<br>0.112  | 0.120<br>0.161 | -0.169<br>0.089               | 0.164<br>0.090 | 1              |     |     |     |
| <b>SAP</b>                     | 0.162<br>0.074  | 0.191<br>0.060  | -0.096<br>0.221                   | 0.097<br>0.166                   | 0.114<br>0.153               | 0.148<br>0.097  | 0.144<br>0.100  | 0.102<br>0.208 | -0.108<br>0.186               | 0.096<br>0.184 | 0.150<br>0.099 | 1   |     |     |

|            |              |              |              |              |              |              |              |              |              |              |              |              |              |          |
|------------|--------------|--------------|--------------|--------------|--------------|--------------|--------------|--------------|--------------|--------------|--------------|--------------|--------------|----------|
| <b>DAP</b> | 0.097        | 0.099        | -0.109       | 0.113        | 0.103        | 0.140        | 0.127        | 0.110        | -0.050       | 0.099        | 0.130        | <b>0.233</b> | <b>1</b>     |          |
|            | <i>0.154</i> | <i>0.119</i> | <i>0.146</i> | <i>0.117</i> | <i>0.176</i> | <i>0.102</i> | <i>0.166</i> | <i>0.196</i> | <i>0.328</i> | <i>0.198</i> | <i>0.138</i> | <b>0.030</b> |              |          |
| <b>BMI</b> | 0.137        | 0.136        | -0.166       | 0.149        | 0.114        | 0.111        | 0.167        | 0.045        | -0.175       | 0.196        | 0.173        | 0.121        | 0.137        | <b>1</b> |
|            | <i>0.101</i> | <i>0.101</i> | <i>0.093</i> | <i>0.095</i> | <i>0.148</i> | <i>0.166</i> | <i>0.082</i> | <i>0.388</i> | <i>0.088</i> | <i>0.059</i> | <i>0.088</i> | <i>0.089</i> | <i>0.101</i> |          |

Abbreviation: SAP Systolic arterial pressure, DAP diastolic arterial pressure, LDL low-density lipoprotein cholesterol, HDL high-density lipoprotein cholesterol, TG triglycerides, hs-CRP high-sensitivity C-reactive protein, ox-LDL oxidized-LDL, sCD40L soluble CD40 ligand, ETP endogenous thrombin potential, TNF $\alpha$  Tumor necrosis factor alpha, IL6 Interleukin-6, IL10 Interleukin-10, BMI body mass index.
